# Supplementary material
Source: PubMed Central journal article supplement (PMC5025706)
Supplement: supp_M116.732735_suppdata.pdf [file supp_M116.732735_suppdata.pdf]

## SUPPLEMENTAL MATERIALS

### All primers used in this study

#### **Stem-loop RT-PCR primers for miR-223-5p**

Stem-loop RT primer:

5'-*GTCGTATCCAGTGCAGGGTCCGAGGTATTCGCACTGGATACGAC CAACTC*-3'

Forward: 5'-GCAGAG cgt gta ttt gac aag -3'

Reverse: 5' - GTGCAGGGTCCGAGGT-3'

#### **Stem-loop RT-PCR primers for miR-223-3p**

Stem-loop RT primer:

5'-*GTCGTATCCAGTGCAGGGTCCGAGGTATTCGCACTGGATACGAC TGGGGT*-3'

Forward: 5'-GCAGAGtgt cag ttt gtc aaat

Reverse: 5' -GTGCAGGGTCCGAGGT-3'

#### **RT-PCR primers for U6**

RT and reverse primer, 5'-GTGCAGGGTCCGAGGT-3';

Forward primer, 5'-CTCGCTTCGGCAGCACA-3').

#### **RT-PCR primers for TNF- $\alpha$**

Forward: 5'-AAACCACCAAGTGGAGGAGC-3'

Reverse: 5'-ACAAGGTACAACCCATCGGC-3'

#### **RT-PCR primers for IL-1 $\beta$**

Forward: 5'-CGTGGACCTTCCAGGATGAG-3'

Reverse: 5'-CATCTCGGAGCCTGTAGTGC-3'

#### **RT-PCR primers for GAPDH**

Forward: 5'-TTGTGTCCGTCGTGGATCTGA-3'

Reverse: 5'-CCTGCTTCACCACCTTCTTGA-3'

#### **Genotyping primers for pre-miR-223 transgenic mice. Expected PCR product size of transgene $\alpha$ MHC-pre-miR-223 is 400bp.**

Forward: 5'-CACATAGAAGCCTAGCCCACAC-3'

Reverse: 5'-GTAAGCTTCTACTCTGATGTTC-3'

#### **Genotyping primers for the internal control: endogenous mouse Oct2 (organic cation transporter, member 2). Expected PCR product size of Oct2 is 196bp.**

Oct forward primer: 5'-TCTTAGCTCTGCTCTCCGGT-3'

Oct Reverse primer: 5'-CACTGGCTGAGGAAGGAGAC-3'

#### **Genotyping primers for pre-miR-223 knockout mice. Expected PCR product size for KO, 500bp; for heterozygote, 500bp and 392bp; for wild-type, 392bp.**

11189 (Forward primer for wild type): 5'-CAGTGTCACGCTCCGTGTAT-3'

oIMR6101 (Forward primer for knockout): 5'-CTTCCTCGTGCTTTACGGTATCG-3'

## Supplemental Figure S1

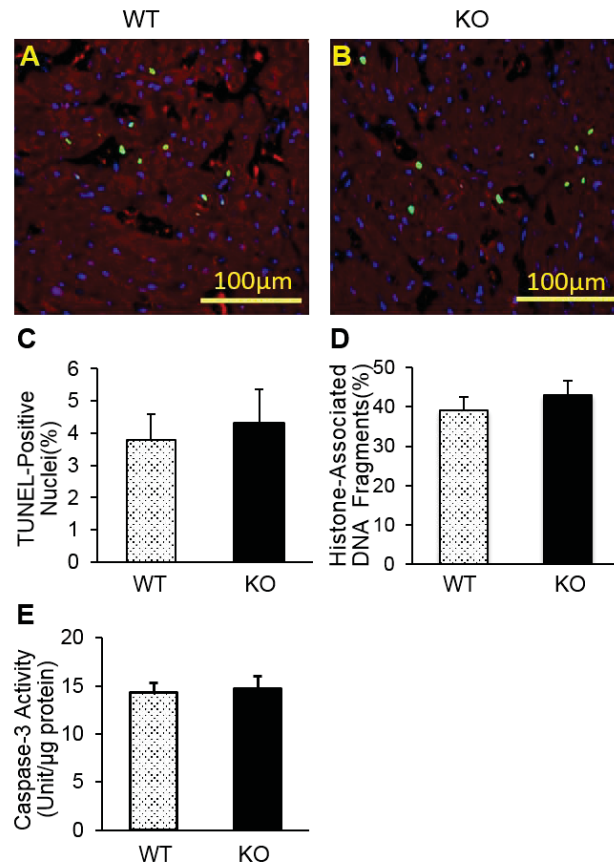

**Figure S1:** Ablation of pre-miR-223 did not increase I/R-induced myocardial apoptosis, compared to WT controls. (A/B) Representative images and (C) quantitative results of the TUNEL-staining assay in WT and KO hearts after *ex vivo* I/R (45min/1h). Green: TUNEL-positive nuclei; red:  $\alpha$ -Actin; blue: DAPI. Scale bar 100 $\mu$ m. (D) The degree of histone-associated DNA fragmentation, and (E) Caspase-3 activity both were similar between WT and KO hearts subjected to *ex vivo* I/R.  $P > 0.05$  vs. WT controls after t- test (n=6 hearts per group).
